# Supplementary material for: The interactive feedback mechanisms between terrestrial water storage and vegetation in the Tibetan Plateau
Source: Frontiers journal article supplement (doi:10.3389/feart.2022.1004846), 2022-10-27
Supplement: Data_Sheet_1.docx [file Data_Sheet_1.docx]

Supporting Information for

**The interactive feedback mechanisms between terrestrial water storage and vegetation in the Tibetan Plateau**

Haijun Deng1,2,3; Yaning Chen4; Xingwei Chen1,2; Yang, Li5,*; Zhiguo Ren6; Zhiwei Zhang7; Zhouyao Zheng1,2; Sheng Hong1,2

(1.Institute of Geography, Fujian Normal University, Fuzhou 350007, China; 2. Fujian Provincial Engineering Research Centre for Monitoring and Assessing Terrestrial Disasters, Fujian Normal University, Fuzhou 350007, China; 3. Fujian Provincial Key Laboratory for Plant Eco-Physiology, Fujian Normal University, Fuzhou 350007, China; 4. State Key Laboratory of Desert and Oasis Ecology, Xinjiang Institute of Ecology and Geography, Chinese Academy of Sciences, Urumqi 830011, China; 5. Nuclear and Radiation Safety Center, Beijing 100082, China; 6. Northwest Institute of Eco-Environment and Resources, Chinese Academy of Sciences, Lanzhou, China; 7. College of Resources and Environmental Sciences, Tibet Agriculture & Animal Husbandry University, Nyingchi 860000, China;)

**Contents of this file**

Figures S1 and S2


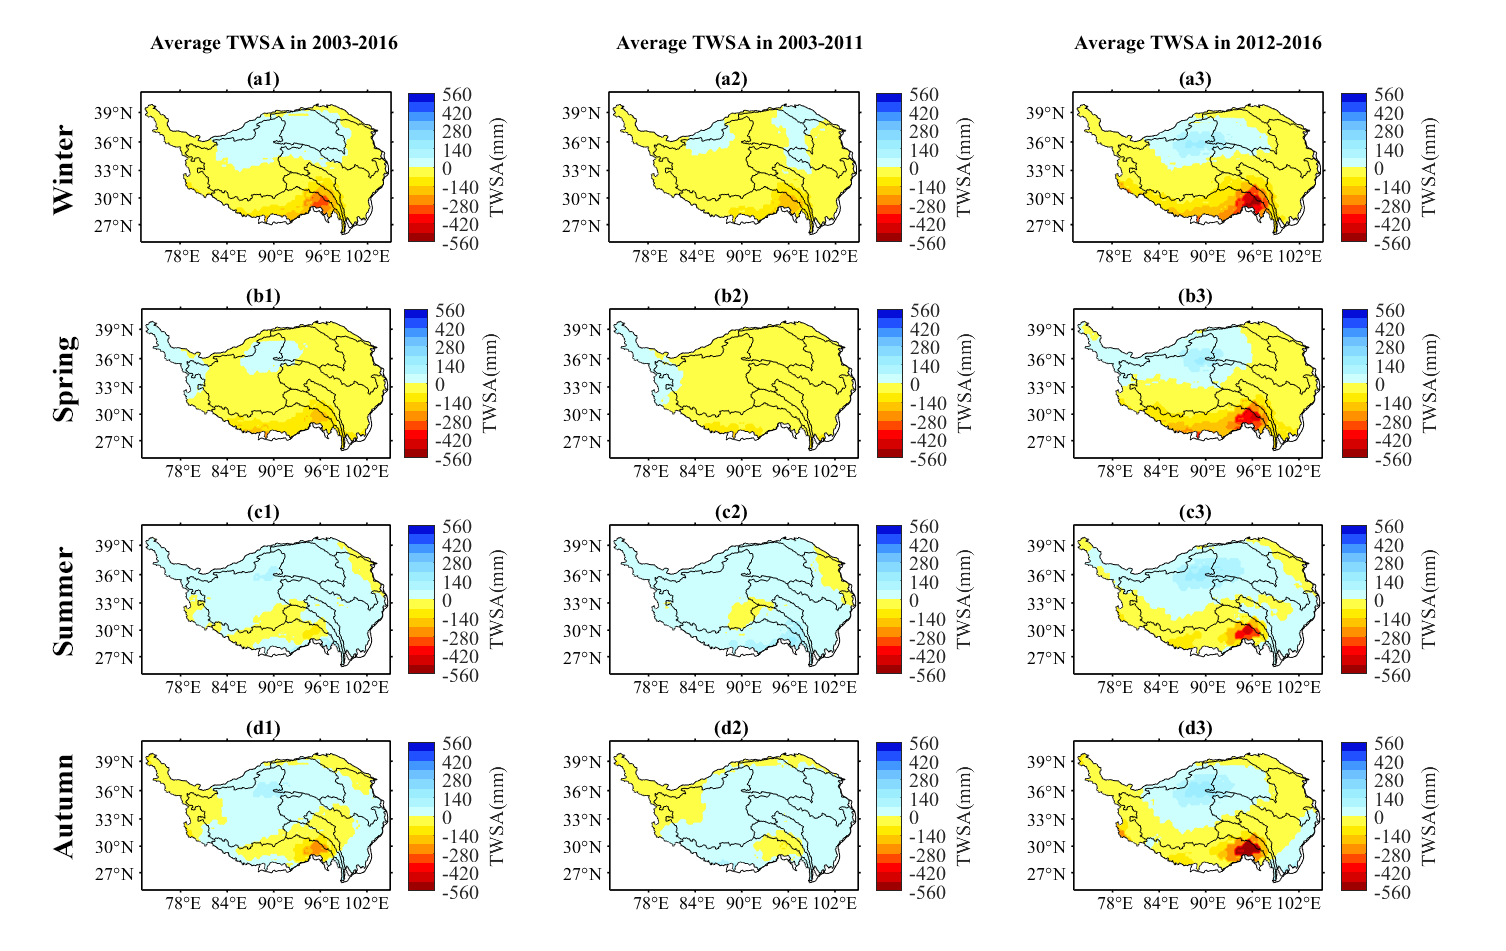


Figure S1 The spatial pattern of average seasonal TWSA in the Tibetan Plateau. From left to right: results for 2003-2016, 2033-2011, and 2012-2016. From top to bottom: results for winter, spring, summer, and autumn.


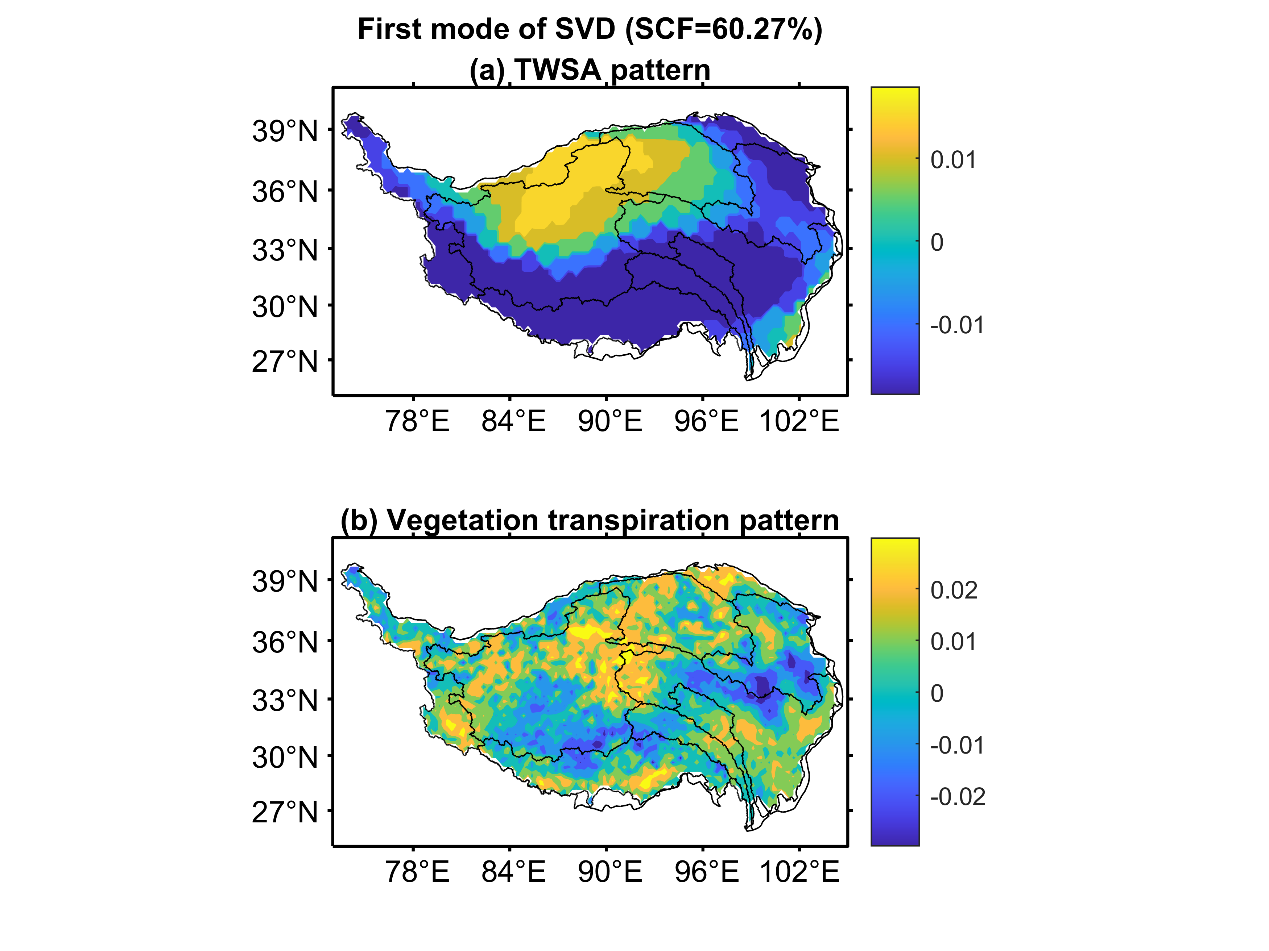


Figure S2. The spatial patterns of TWSA (a) and vegetation transpiration (b) in the first mode of SVD. SCF is the variance contribution of the first mode of SVD.
